# Supplementary material for: First Isolation of a Herpesvirus (Family Alloherpesviridae) from Great Lakes Lake Sturgeon (Acipenser fulvescens)
Source: MDPI journal article supplement (doi:10.3390/ani12233230), 2022-11-22
Supplement: s1 [file s1]

**Table S1:** The seventeen herpesviruses utilized for genomic comparisons and corresponding references.

| Species                          | Virus                                 | Host                            | Abbreviation | Strain     | Accession Number      | Reference |
|----------------------------------|---------------------------------------|---------------------------------|--------------|------------|-----------------------|-----------|
| <i>Ranid herpesvirus 1</i>       | Lucké tumor herpesvirus               | <i>Rana pipiens</i>             | RaHV1        | McKinnell  | DQ665917              | 50        |
| <i>Ranid herpesvirus 2</i>       | frog herpesvirus 4                    | <i>Rana pipiens</i>             | RaHV2        | Rafferty   | DQ665652              | 51        |
| <i>Ranid herpesvirus 3</i>       | ranid herpesvirus 3                   | <i>Rana temporaria</i>          | RaHV3        | FO1_2015   | KX832224              | 52        |
|                                  | bufonid herpesvirus 1                 | <i>Bufo bufo</i>                | BfHV1        | FO1_2015   | MF143550              | 53        |
|                                  | ranid herpesvirus 4                   | <i>Hoplobatrachus rugulosus</i> | RaHV4        | cxx6       | MZ244210-<br>MZ244215 | 54        |
| <i>Anguillid herpesvirus 1</i>   | Japanese eel herpesvirus              | <i>Anguilla anguilla</i>        | AngHV1       | 500138     | FJ940765              | 55        |
| <i>Cyprinid herpesvirus 1</i>    | carp pox herpesvirus                  | <i>Cyprinus carpio</i>          | CyHV1        | NG-J1      | JQ815363              | 36        |
| <i>Cyprinid herpesvirus 2</i>    | goldfish hematopoietic necrosis virus | <i>Carassius auratus</i>        | CyHV2        | ST-J1      | JQ815364              | 36        |
| <i>Cyprinid herpesvirus 3</i>    | koi herpesvirus                       | <i>Cyprinus carpio</i>          | CyHV3        | KHV-U      | DQ657948              | 56        |
| <i>Acipenserid herpesvirus 2</i> | white sturgeon herpesvirus 2          | <i>Acipenser transmontanus</i>  | AciHV2       | SRWSHV     | FJ815289              | 57        |
| <i>Ictalurid herpesvirus 1</i>   | channel catfish virus                 | <i>Ictalurus furcatus</i>       | IcHV1        | Auburn 1   | M75136                | 58        |
| <i>Ictalurid herpesvirus 1</i>   | blue catfish alloherpesvirus          | <i>Ictalurus furcatus</i>       | IcHV1        | S98-675    | MK392382              | 59        |
| <i>Ictalurid herpesvirus 2</i>   | black bullhead herpesvirus            | <i>Ameiurus melas</i>           | IcHV2        | 760/94     | MG271984              | 60        |
|                                  | silurid herpesvirus 1                 | <i>Kryptopterus bicirrhus</i>   | SiHV1        | KRB14001   | MH048901              | 61        |
|                                  | acipenserid herpesvirus 1             | <i>Acipenser transmontanus</i>  | AciHV1       | California | OK275723-<br>OK275734 | 22        |
|                                  | lake sturgeon herpesvirus             | <i>Acipenser fulvescens</i>     | LSHV         | Wolf River | OK485036              | 22        |
|                                  | sterlet herpesvirus                   | <i>Acipenser ruthenus</i>       |              | Gen_M01    | VTUV01000924          | 62        |

**Table S2.** Sequences producing significant (e-value < 1.0E-03) alignments (Blastn) with the 2,100 bp complete CDS of the Great Lakes lake sturgeon herpesvirus isolate 200413-11TC DNA packaging terminase subunit I.

| Description                                    | Acc. No. | % identity | alignment length<br>(bp) | mismatches | e-value   | bit score |
|------------------------------------------------|----------|------------|--------------------------|------------|-----------|-----------|
| Acipenserid herpesvirus 1 strain UC Davis      | OK275734 | 85.7       | 2088                     | 289        | 0         | 2422      |
| Lake sturgeon herpesvirus strain Wolf River    | OK485036 | 86.7       | 825                      | 110        | 0         | 993       |
| Lake sturgeon herpesvirus strain Wolf River    | OK485036 | 93.3       | 570                      | 38         | 0         | 857       |
| Lake sturgeon herpesvirus strain Wolf River    | OK485036 | 82.7       | 681                      | 118        | 0         | 697       |
| Acipenserid herpesvirus 1 isolate Italy        | EF535575 | 90.7       | 290                      | 27         | 2.00E-106 | 402       |
| Acipenserid herpesvirus 1                      | EF535573 | 90.0       | 290                      | 29         | 1.04E-103 | 393       |
| Lake sturgeon herpesvirus isolate WVL19064-03  | OL440177 | 99.4       | 156                      | 1          | 5.74E-69  | 278       |
| Lake sturgeon herpesvirus isolate WVL18106-01A | OL440176 | 99.4       | 156                      | 1          | 5.74E-69  | 278       |
| Lake sturgeon herpesvirus isolate WVL18090-01A | OL440175 | 99.4       | 156                      | 1          | 5.74E-69  | 278       |
| Lake sturgeon herpesvirus isolate WVL18089-02A | OL440173 | 99.4       | 156                      | 1          | 5.74E-69  | 278       |
| Lake sturgeon herpesvirus isolate WVL21072-4   | OL440170 | 99.4       | 156                      | 1          | 5.74E-69  | 278       |
| Lake sturgeon herpesvirus isolate WVL17229-01A | OL440174 | 96.8       | 156                      | 5          | 1.54E-63  | 260       |
| Lake sturgeon herpesvirus isolate WVL19055-03  | OL440172 | 96.2       | 156                      | 6          | 1.88E-62  | 255       |
| Lake sturgeon herpesvirus isolate WVL19077-02  | OL440179 | 95.5       | 156                      | 7          | 7.98E-61  | 251       |
| Lake sturgeon herpesvirus isolate WVL19077-01  | OL440178 | 95.5       | 156                      | 7          | 7.98E-61  | 251       |
| Lake sturgeon herpesvirus isolate WVL21072-1   | OL440171 | 95.5       | 156                      | 7          | 7.98E-61  | 251       |
| Tiger shark herpes-like virus                  | MZ381454 | 65.9       | 369                      | 115        | 2.01E-11  | 86        |
| Ranid herpesvirus 2 strain ATCC VR-568         | DQ665652 | 72.4       | 123                      | 34         | 1.54E-06  | 69.8      |

**Table S3.** Sequences producing significant (e-value < 1.0E-03) alignments (Blastn) with the 4,638 bp complete CDS of Great Lakes lake sturgeon herpesvirus isolate 200413-11TC DNA polymerase catalytic subunit.

| <b>Description</b>                           | <b>Acc. No.</b> | <b>% identity</b> | <b>alignment<br/>(bp)</b> | <b>mismatches</b> | <b>e-<br/>value</b> | <b>bit<br/>score</b> |
|----------------------------------------------|-----------------|-------------------|---------------------------|-------------------|---------------------|----------------------|
| Lake sturgeon herpesvirus strain Wolf River  | OK485036        | 94.264            | 2859                      | 143               | 0                   | 4409                 |
| Lake sturgeon herpesvirus strain Wolf River  | OK485036        | 90.777            | 1865                      | 100               | 0                   | 2631                 |
| Acipenserid herpesvirus 1 strain UC Davis    | OK275729        | 80.449            | 4629                      | 860               | 0                   | 4250                 |
| Acipenserid herpesvirus 1 isolate WSHV-03-CA | EF685904        | 82.03             | 473                       | 85                | 1.05E-126           | 471                  |
| Acipenserid herpesvirus 1 isolate AciHV1 DNA | EF685903        | 80.973            | 473                       | 90                | 3.43E-120           | 448                  |
| Cyprinid herpesvirus 3 strain GY-01          | MK260013        | 88.525            | 61                        | 7                 | 6.65E-09            | 79.7                 |
| Cyprinid herpesvirus 3 strain T              | MG925491        | 88.525            | 61                        | 7                 | 6.65E-09            | 79.7                 |
| Cyprinid herpesvirus 3 strain M3             | MG925490        | 88.525            | 61                        | 7                 | 6.65E-09            | 79.7                 |
| Cyprinid herpesvirus 3 strain I              | MG925489        | 88.525            | 61                        | 7                 | 6.65E-09            | 79.7                 |
| Cyprinid herpesvirus 3 strain GZ11-SC        | MG925488        | 88.525            | 61                        | 7                 | 6.65E-09            | 79.7                 |
| Cyprinid herpesvirus 3 strain FL             | MG925487        | 88.525            | 61                        | 7                 | 6.65E-09            | 79.7                 |
| Cyprinid herpesvirus 3 strain E              | MG925486        | 88.525            | 61                        | 7                 | 6.65E-09            | 79.7                 |
| Cyprinid herpesvirus 3 strain Cavoy          | MG925485        | 88.525            | 61                        | 7                 | 6.65E-09            | 79.7                 |
| Cyprinid herpesvirus 3 isolate PP3_070411    | KX544848        | 88.525            | 61                        | 7                 | 6.65E-09            | 79.7                 |
| Cyprinid herpesvirus 3 isolate I_10_3        | KX544847        | 88.525            | 61                        | 7                 | 6.65E-09            | 79.7                 |
| Cyprinid herpesvirus 3 isolate I_09_2i3      | KX544846        | 88.525            | 61                        | 7                 | 6.65E-09            | 79.7                 |
| Cyprinid herpesvirus 3 isolate J1_101110     | KX544845        | 88.525            | 61                        | 7                 | 6.65E-09            | 79.7                 |
| Cyprinid herpesvirus 3 isolate CB4_181110    | KX544844        | 88.525            | 61                        | 7                 | 6.65E-09            | 79.7                 |
| Cyprinid herpesvirus 3 isolate J2_101110     | KX544843        | 88.525            | 61                        | 7                 | 6.65E-09            | 79.7                 |
| Cyprinid herpesvirus 3 isolate PoB3          | KX544842        | 88.525            | 61                        | 7                 | 6.65E-09            | 79.7                 |

|                                                          |          |        |    |    |          |      |
|----------------------------------------------------------|----------|--------|----|----|----------|------|
| Cyprinid herpesvirus 3 isolate FL BAC revertant ORF56-57 | KP343684 | 88.525 | 61 | 7  | 6.65E-09 | 79.7 |
| Cyprinid herpesvirus 3 isolate FL BAC revertant ORF136   | KP343683 | 88.525 | 61 | 7  | 6.65E-09 | 79.7 |
| Cyprinid herpesvirus 3 strain KHV-GZ11                   | KJ627438 | 88.525 | 61 | 7  | 6.65E-09 | 79.7 |
| Cyprinid herpesvirus 3 isolate MN                        | MT914509 | 88.525 | 61 | 7  | 6.65E-09 | 79.7 |
| Cyprinid herpesvirus 3 DNA TUMST1                        | AP008984 | 88.525 | 61 | 7  | 6.65E-09 | 79.7 |
| Cyprinid herpesvirus 3 strain KHV-U                      | DQ657948 | 88.525 | 61 | 7  | 6.65E-09 | 79.7 |
| Koi herpesvirus strain KHV-I                             | DQ177346 | 88.525 | 61 | 7  | 6.65E-09 | 79.7 |
| Koi herpesvirus isolate 323909                           | DQ128163 | 88.525 | 61 | 7  | 6.65E-09 | 79.7 |
| Cyprinid herpesvirus 3 KHV-JG01                          | AB196133 | 88.525 | 61 | 7  | 6.65E-09 | 79.7 |
| Cyprinid herpesvirus 3 KHV-JG07                          | AB196131 | 88.525 | 61 | 7  | 6.65E-09 | 79.7 |
| Cyprinid herpesvirus 3 KHV-JG05                          | AB195962 | 88.525 | 61 | 7  | 6.65E-09 | 79.7 |
| Cyprinid herpesvirus 3 KHV NRIA 0301                     | AB195961 | 88.525 | 61 | 7  | 6.65E-09 | 79.7 |
| Cyprinid herpesvirus 3 KHV-I                             | AB195960 | 88.525 | 61 | 7  | 6.65E-09 | 79.7 |
| Cyprinid herpesvirus 3 KHV-U                             | AB195959 | 88.525 | 61 | 7  | 6.65E-09 | 79.7 |
| Cyprinid herpesvirus 1 isolate Ma1                       | MK507842 | 83.333 | 72 | 12 | 2.32E-08 | 77   |
| Cyprinid herpesvirus 1 strain NG-J1                      | JQ815363 | 83.333 | 72 | 12 | 2.32E-08 | 77   |
| Anguillid herpesvirus 1 isolate HVA980811                | KX027736 | 86.792 | 53 | 7  | 1.47E-04 | 65.3 |
| Anguillid herpesvirus 1 strain UK N080                   | MW580855 | 86.792 | 53 | 7  | 1.47E-04 | 65.3 |
| Anguillid herpesvirus 1 strain HVA 486123                | MW580854 | 86.792 | 53 | 7  | 1.47E-04 | 65.3 |
| Anguillid herpesvirus 1 strain DK-206116-1               | MW580853 | 86.792 | 53 | 7  | 1.47E-04 | 65.3 |
| Anguillid herpesvirus 1 strain DK-205223-2               | MW580852 | 86.792 | 53 | 7  | 1.47E-04 | 65.3 |

|                                                |          |        |    |   |          |      |
|------------------------------------------------|----------|--------|----|---|----------|------|
| Anguillid herpesvirus 1 strain DK-200249       | MW580851 | 86.792 | 53 | 7 | 1.47E-04 | 65.3 |
| Anguillid herpesvirus 1 strain DK-2008-50-66-1 | MW580850 | 86.792 | 53 | 7 | 1.47E-04 | 65.3 |
| Anguillid herpesvirus 1 strain 500138          | MW580849 | 86.792 | 53 | 7 | 1.47E-04 | 65.3 |
| Anguillid herpesvirus 1 isolate C3P2           | GU233800 | 86.792 | 53 | 7 | 1.47E-04 | 65.3 |

---

**Table S4.** Average nucleotide identity estimations for channel catfish virus (IcHV1; NC\_001493) and blue catfish alloherpesvirus (IcHV1; MK392382).

| CCV vs BCAHV      |                  |                                         |                                         |                                         |
|-------------------|------------------|-----------------------------------------|-----------------------------------------|-----------------------------------------|
| Minimum alignment | Minimum identity | One-way ANI 1                           | One-way ANI 2                           | Two-way ANI                             |
| 125               | 70%              | 93.38% (SD: 4.79%), from 651 fragments. | 93.42% (SD: 4.75%), from 651 fragments. | 94.73% (SD: 3.49%), from 525 fragments. |
| 125               | 75%              | 93.38% (SD: 4.79%), from 651 fragments. | 93.42% (SD: 4.75%), from 651 fragments. | 94.73% (SD: 3.49%), from 525 fragments. |
| 125               | 80%              | 93.48% (SD: 4.59%), from 649 fragments. | 93.52% (SD: 4.53%), from 648 fragments. | 94.73% (SD: 3.49%), from 525 fragments. |
| 125               | 85%              | 93.87% (SD: 3.96%), from 635 fragments. | 93.90% (SD: 3.92%), from 636 fragments. | 94.78% (SD: 3.37%), from 524 fragments. |
| 250               | 70%              | 93.38% (SD: 4.79%), from 651 fragments. | 93.41% (SD: 4.79%), from 650 fragments. | 94.73% (SD: 3.49%), from 525 fragments. |
| 250               | 75%              | 93.38% (SD: 4.79%), from 651 fragments. | 93.41% (SD: 4.79%), from 650 fragments. | 94.73% (SD: 3.49%), from 525 fragments. |
| 250               | 80%              | 93.49% (SD: 4.59%), from 647 fragments. | 93.51% (SD: 4.57%), from 647 fragments. | 94.73% (SD: 3.49%), from 525 fragments. |
| 250               | 85%              | 93.91% (SD: 3.96%), from 628 fragments. | 93.96% (SD: 3.92%), from 627 fragments. | 94.79% (SD: 3.37%), from 523 fragments. |
| 500               | 70%              | 93.71% (SD: 4.52%), from 620 fragments. | 93.69% (SD: 4.59%), from 623 fragments. | 94.73% (SD: 3.49%), from 525 fragments. |
| 500               | 75%              | 93.71% (SD: 4.52%), from 620 fragments. | 93.69% (SD: 4.59%), from 623 fragments. | 94.73% (SD: 3.49%), from 525 fragments. |
| 500               | 80%              | 93.80% (SD: 4.34%), from 617 fragments. | 93.82% (SD: 4.33%), from 619 fragments. | 94.73% (SD: 3.49%), from 525 fragments. |
| 500               | 85%              | 94.13% (SD: 3.82%), from 603 fragments. | 94.14% (SD: 3.82%), from 605 fragments. | 94.79% (SD: 3.37%), from 523 fragments. |
| 750               | 70%              | 94.08% (SD: 4.16%), from 586 fragments. | 94.12% (SD: 4.16%), from 584 fragments. | 94.76% (SD: 3.46%), from 523 fragments. |
| 750               | 75%              | 94.08% (SD: 4.16%), from 586 fragments. | 94.12% (SD: 4.16%), from 584 fragments. | 94.76% (SD: 3.46%), from 523 fragments. |
| 750               | 80%              | 94.12% (SD: 4.09%), from 585 fragments. | 94.19% (SD: 4.02%), from 582 fragments. | 94.76% (SD: 3.46%), from 523 fragments. |
| 750               | 85%              | 94.35% (SD: 3.67%), from 576 fragments. | 94.39% (SD: 3.66%), from 574 fragments. | 94.82% (SD: 3.34%), from 521 fragments. |

**Table S5.** Average nucleotide identity estimations for Cyprinid herpesvirus 1 (CyHV1; JQ815363) and Cyprinid herpesvirus 3 (CyHV3; MK260013).

| CyHV1 vs CyHV3    |     |                                        |                                        |                   |
|-------------------|-----|----------------------------------------|----------------------------------------|-------------------|
| Minimum alignment |     | Minimum identity                       | One-way ANI 1                          | One-way ANI 2     |
| 125               | 70% | 74.15% (SD: 4.61%), from 78 fragments. | 74.46% (SD: 4.43%), from 76 fragments. | Insufficient hits |
| 125               | 75% | 75.97% (SD: 3.86%), from 58 fragments. | 76.42% (SD: 3.56%), from 55 fragments. | Insufficient hits |
| 125               | 80% | Insufficient hits                      | Insufficient hits                      | Insufficient hits |
| 125               | 85% | Insufficient hits                      | Insufficient hits                      | Insufficient hits |
| 250               | 70% | 72.90% (SD: 3.98%), from 57 fragments. | 73.33% (SD: 4.02%), from 54 fragments. | Insufficient hits |
| 250               | 75% | Insufficient hits                      | Insufficient hits                      | Insufficient hits |
| 250               | 80% | Not tested                             | Not tested                             | Not tested        |
| 250               | 85% | Not tested                             | Not tested                             | Not tested        |
| 500               | 70% | Insufficient hits                      | Insufficient hits                      | Insufficient hits |
| 500               | 75% | Insufficient hits                      | Insufficient hits                      | Insufficient hits |
| 500               | 80% | Not tested                             | Not tested                             | Not tested        |
| 500               | 85% | Not tested                             | Not tested                             | Not tested        |
| 750               | 70% | Insufficient hits                      | Insufficient hits                      | Insufficient hits |
| 750               | 75% | Not tested                             | Not tested                             | Not tested        |
| 750               | 80% | Not tested                             | Not tested                             | Not tested        |
| 750               | 85% | Not tested                             | Not tested                             | Not tested        |
